# Supplementary material
Source: Springer Nature journal article supplement (http://www.springermedizin.de/resource/supplementary/12885_2008_1296_MOESM3_ESM.pdf/9471678)

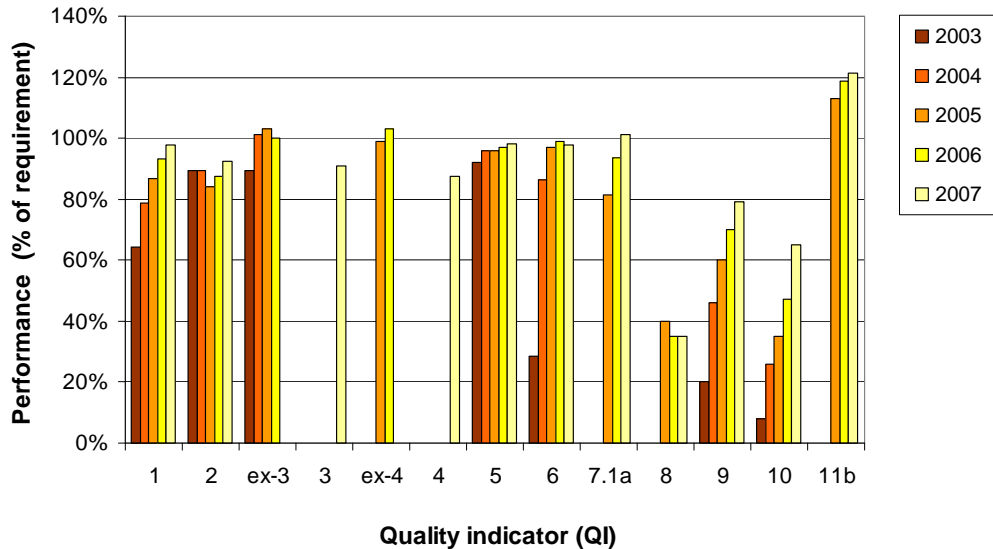

Supplement: MOESM3 [file 9471678]
